# Supplementary material
Source: PubMed Central journal article supplement (PMC3422469)

# Supplementary Figure 1

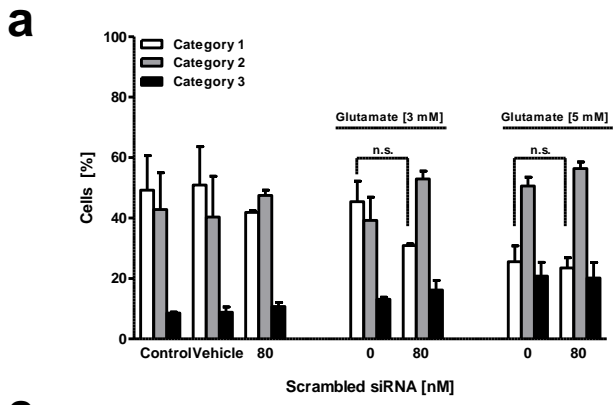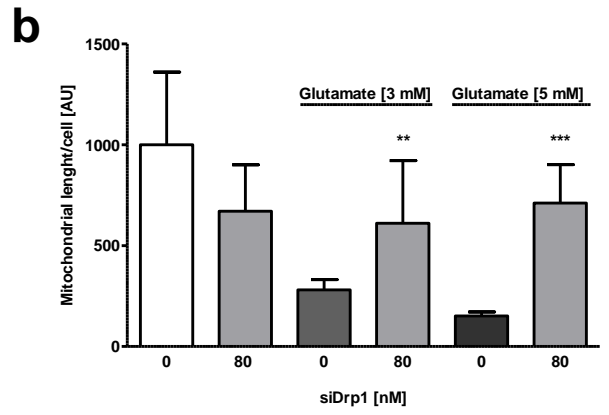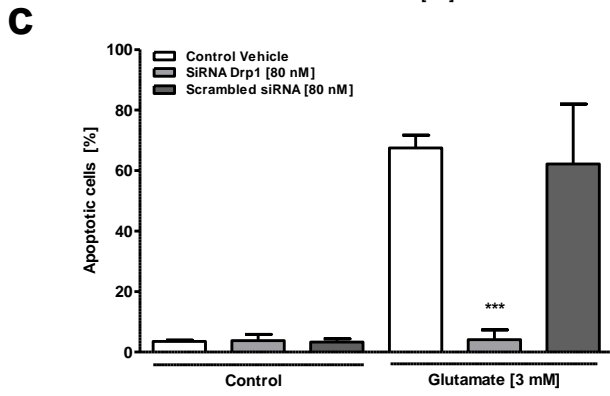

# Supplementary Figure 2

**a**

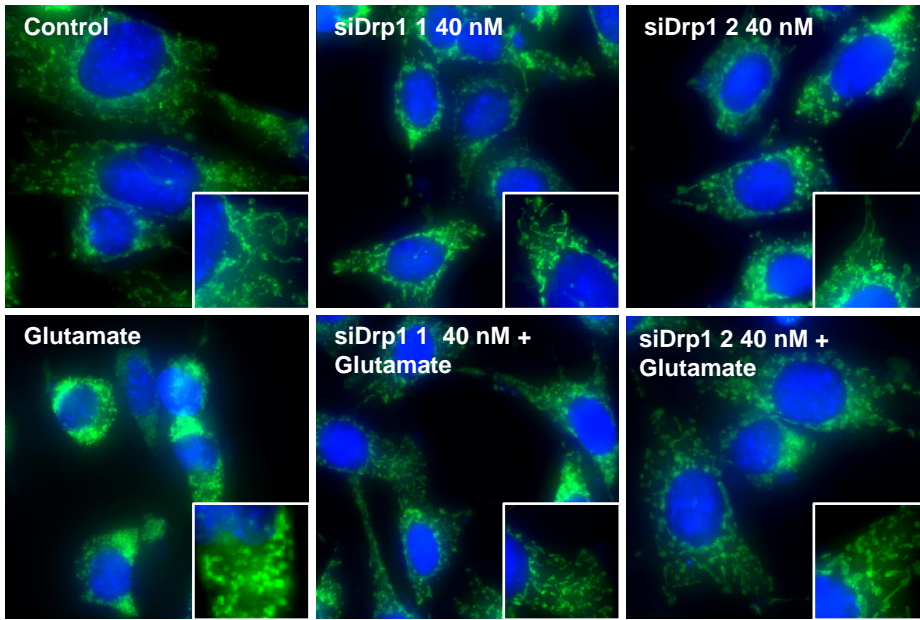

**b**

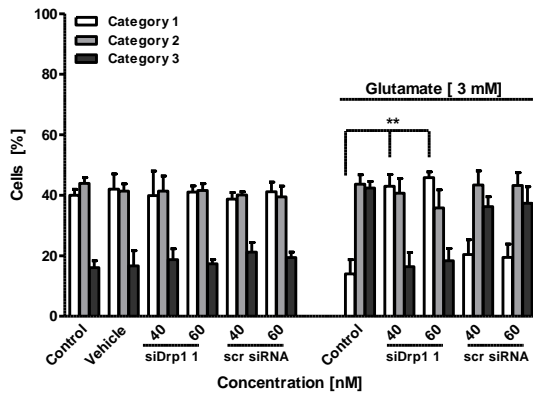

**c**

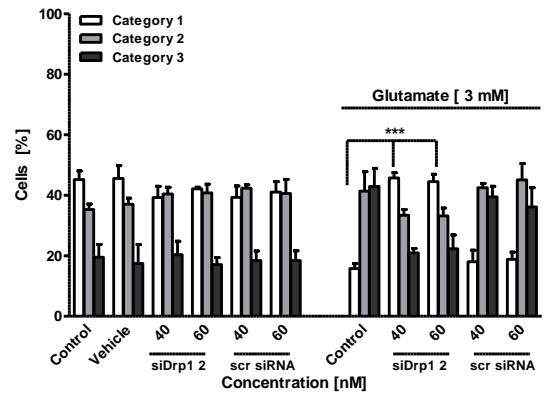

**d**

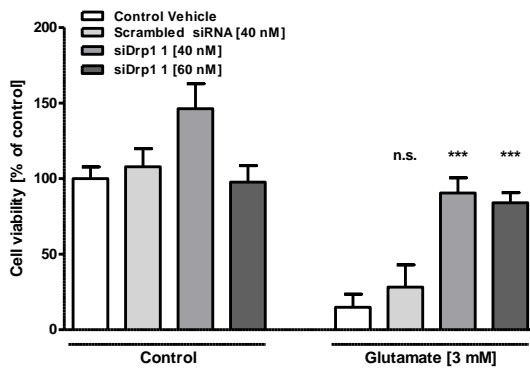

**e**

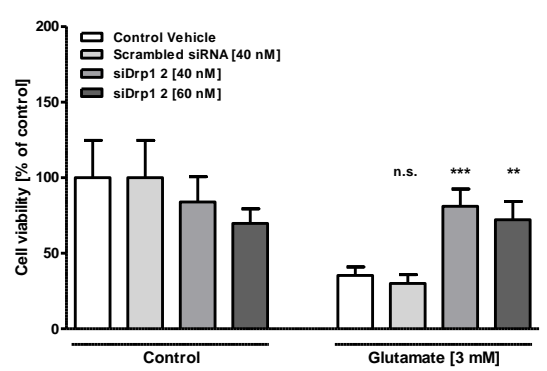

**f**

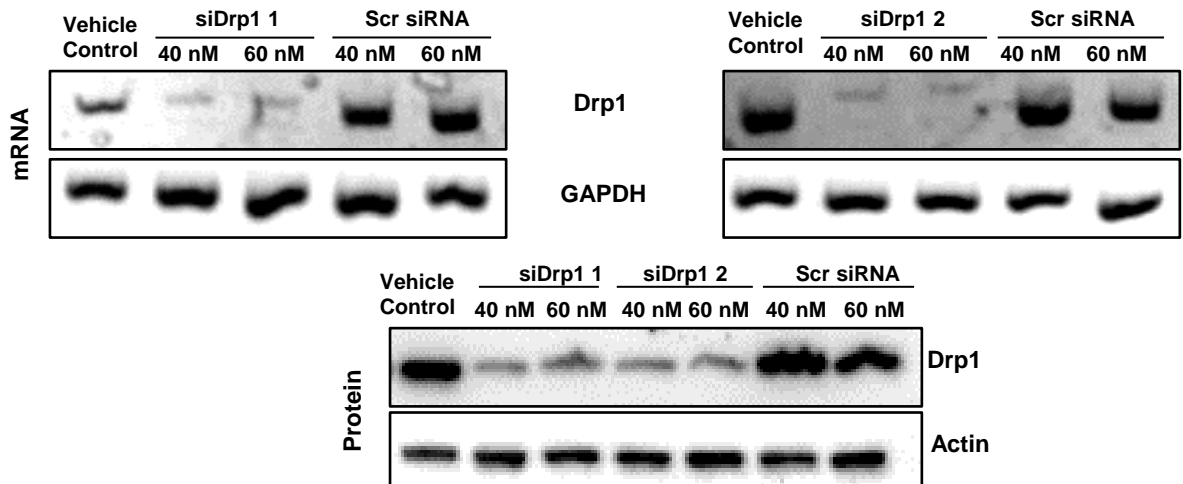

# Supplementary Figure 3

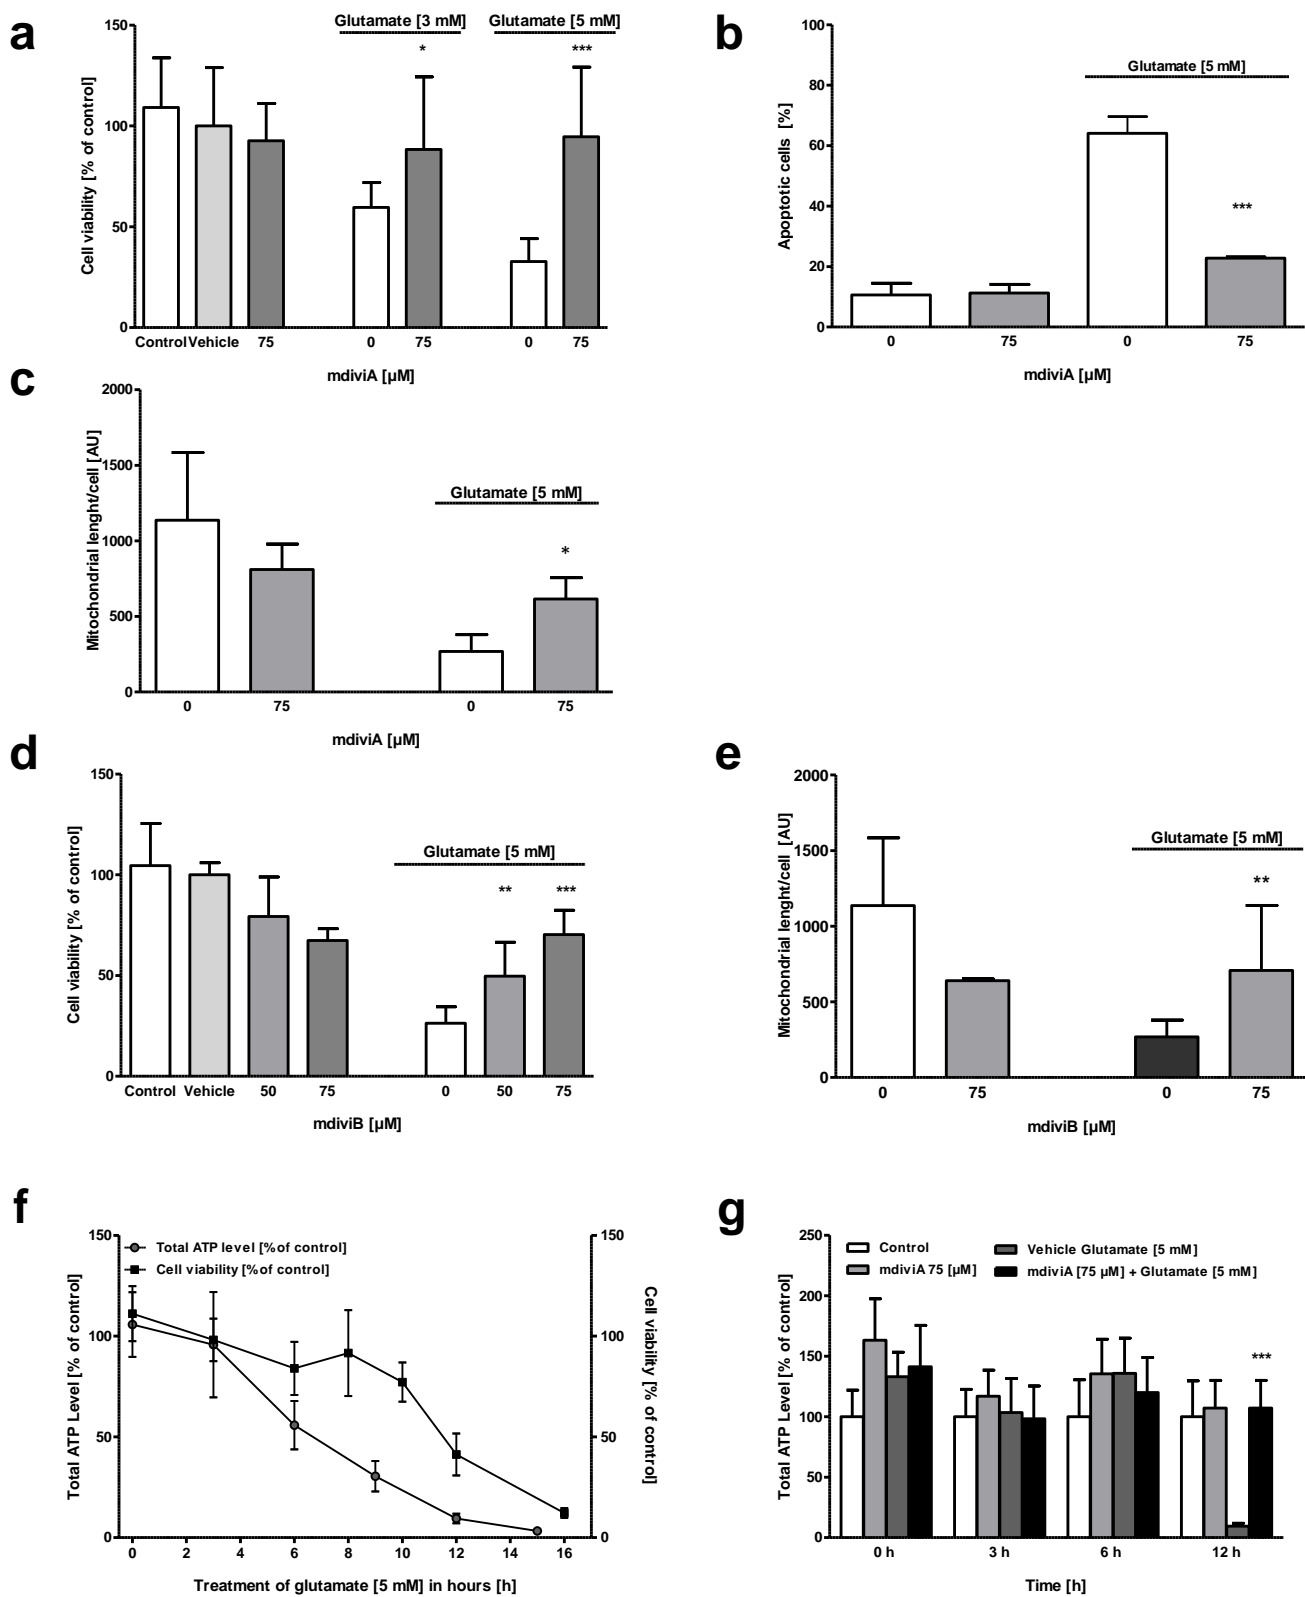

# Supplementary Figure 4

**a**

Glutamate [5 mM]

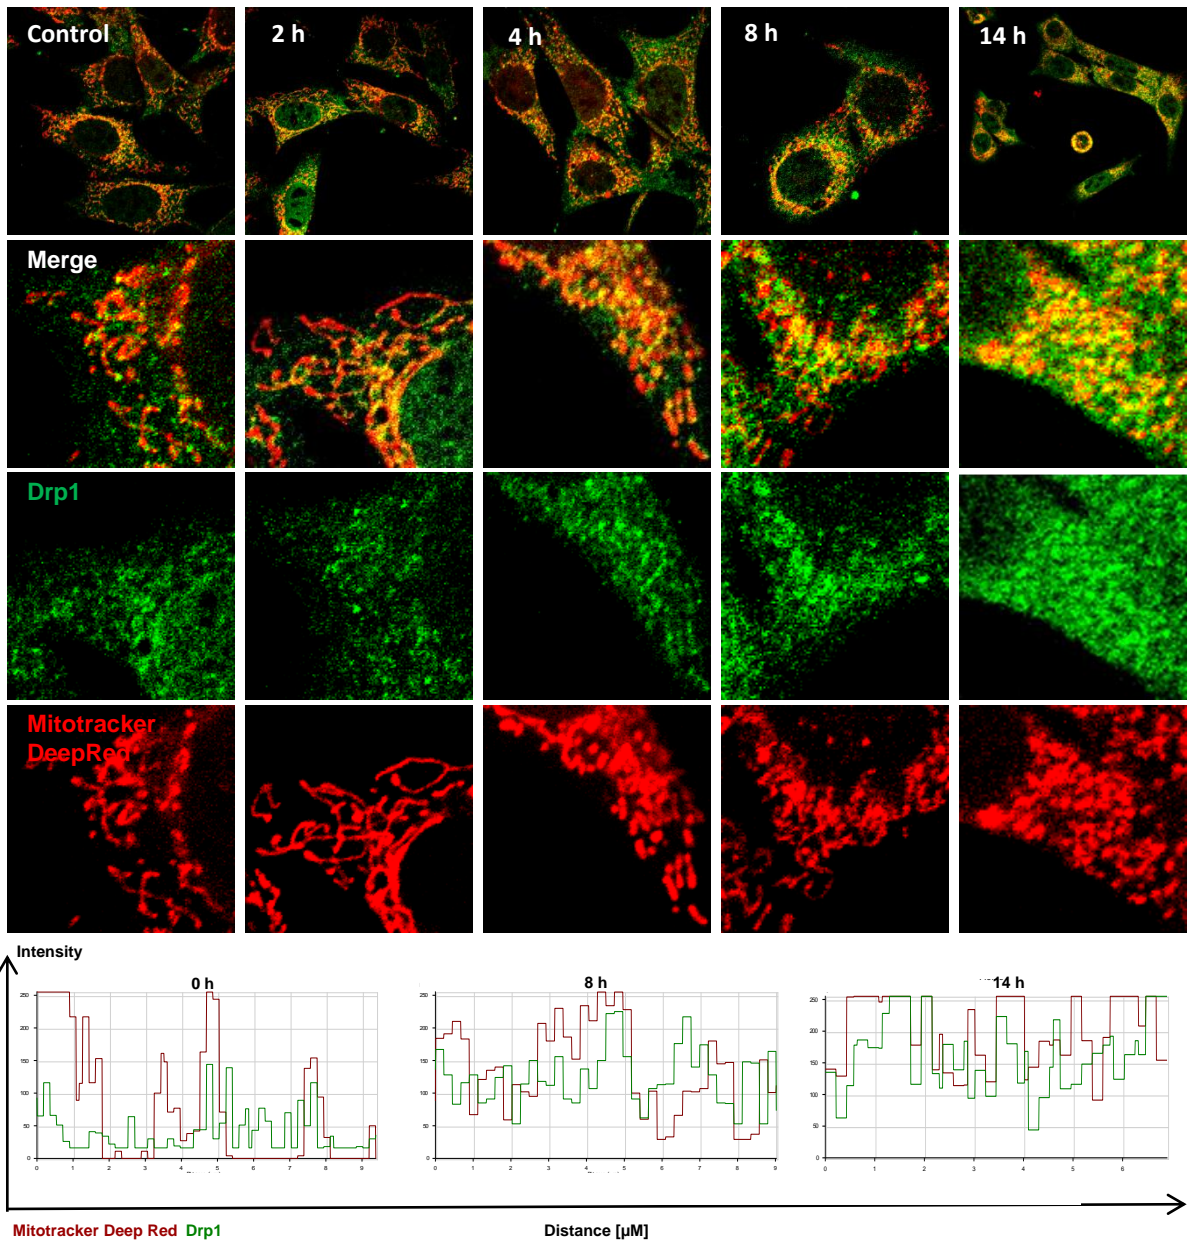

**b**

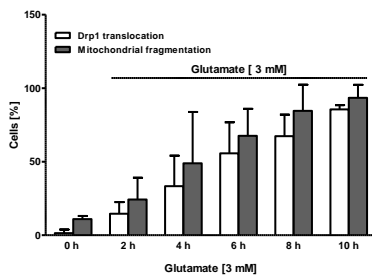

# Supplementary Figure 5

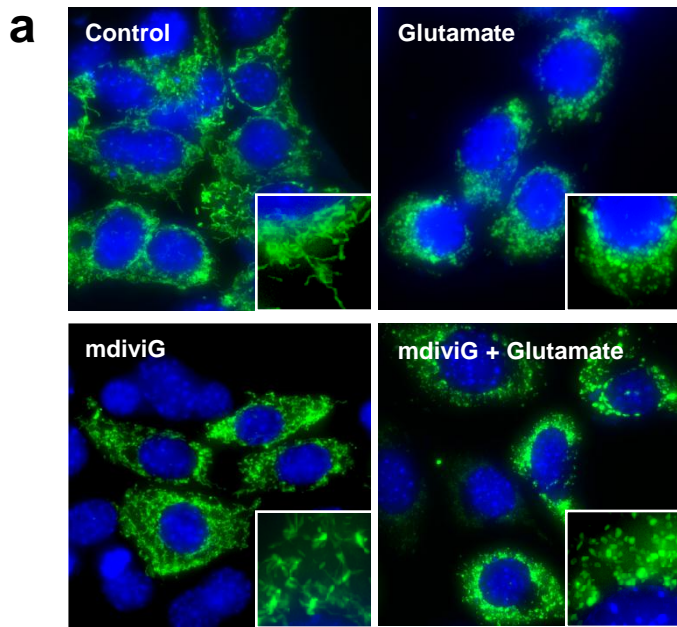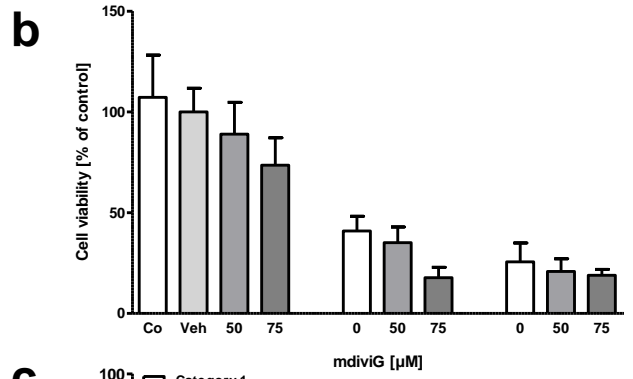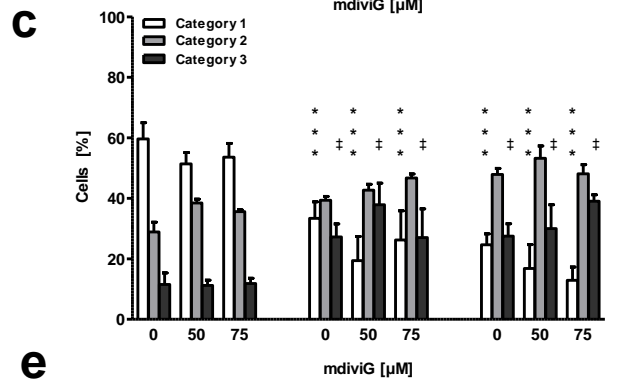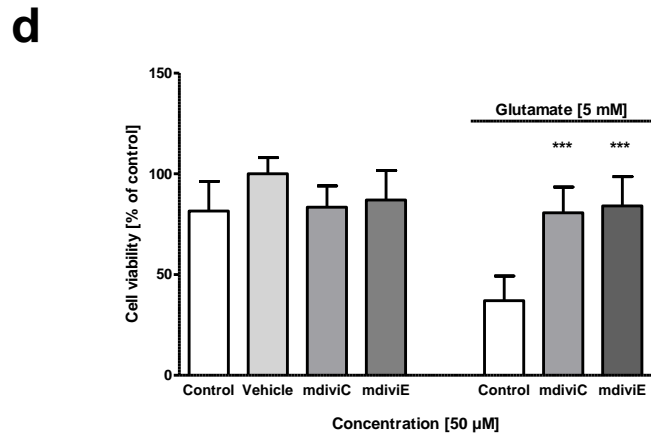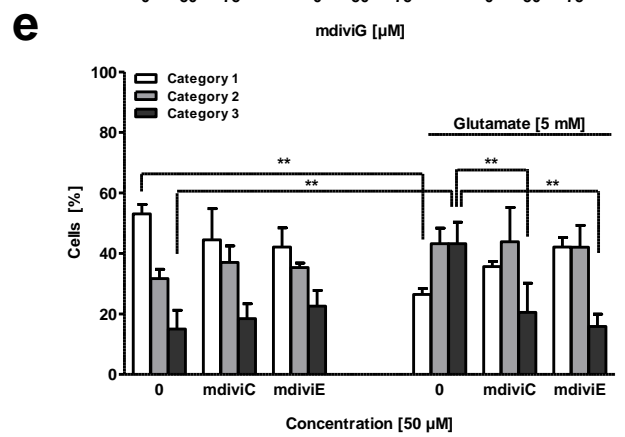

# Supplementary Figure 6

**a**

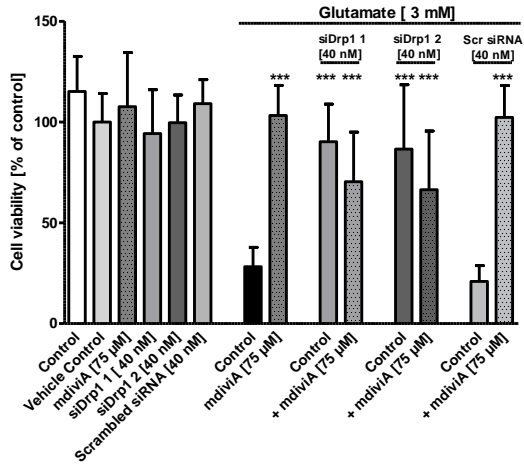

**b**

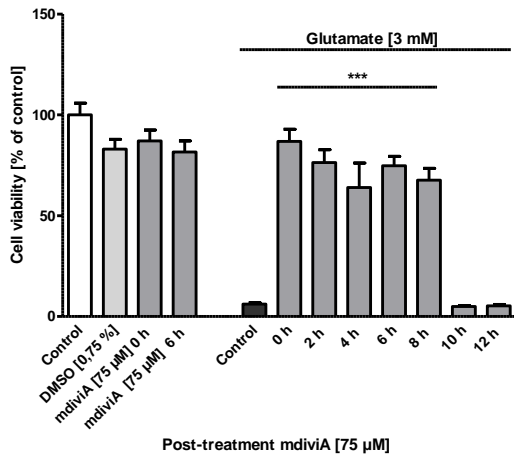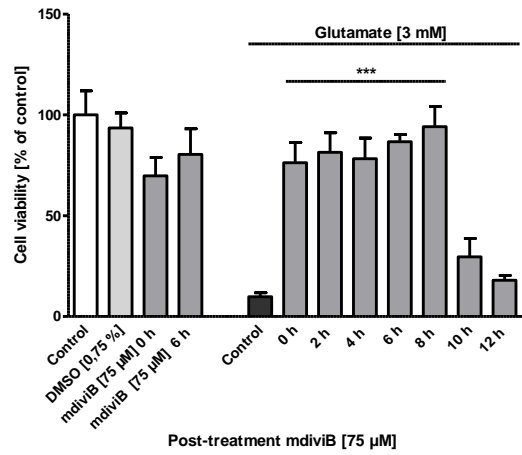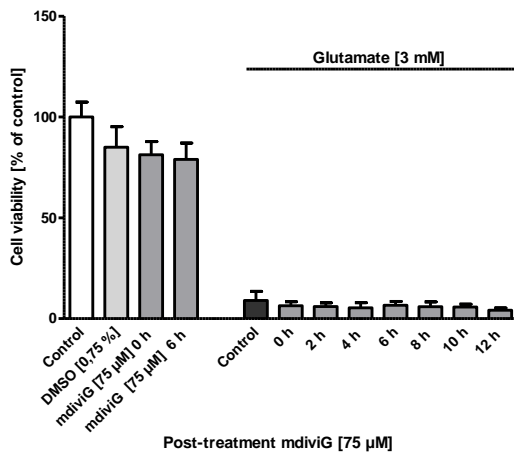

# Supplementary Figure 7

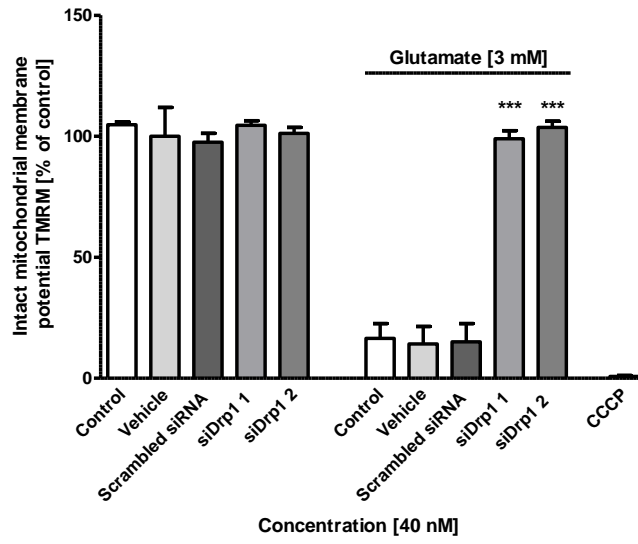



# Supplementary Figure 8

**a**

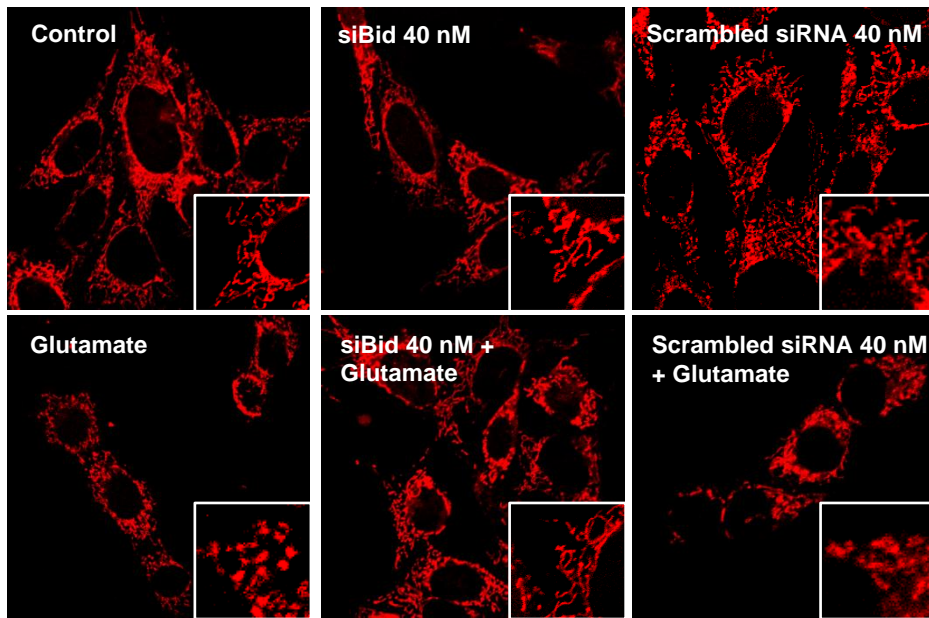

**b**

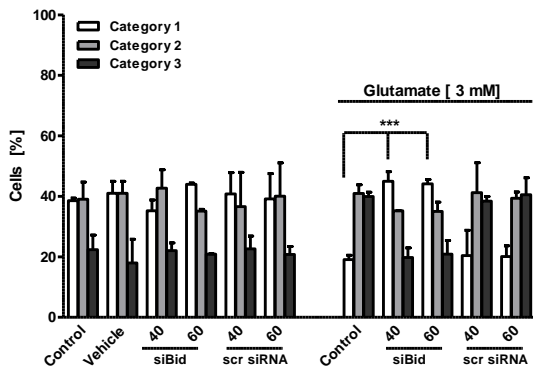

**c**

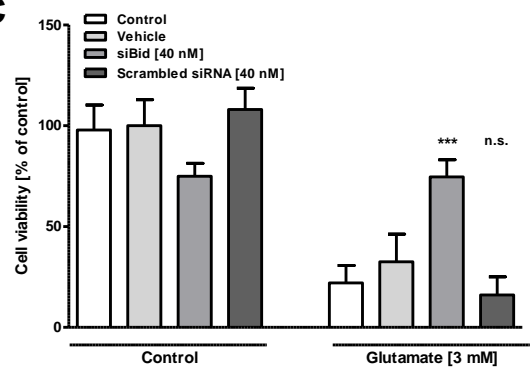

**d**

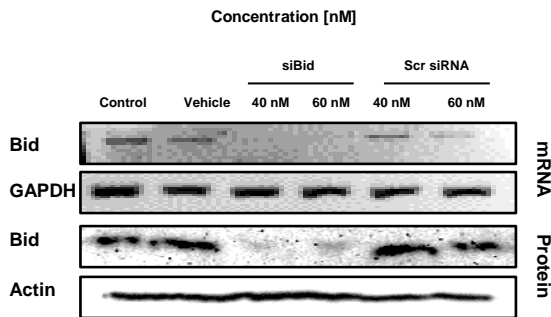

**e**

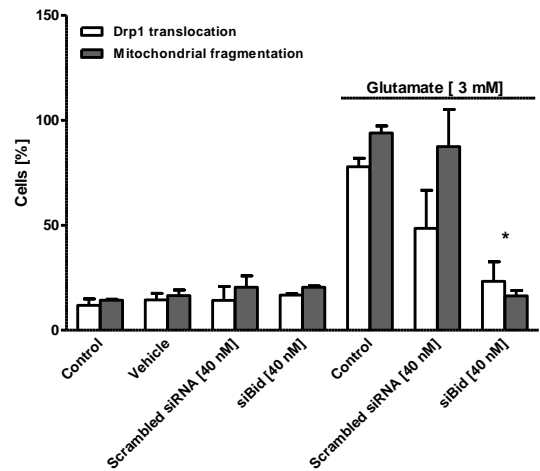

**f**

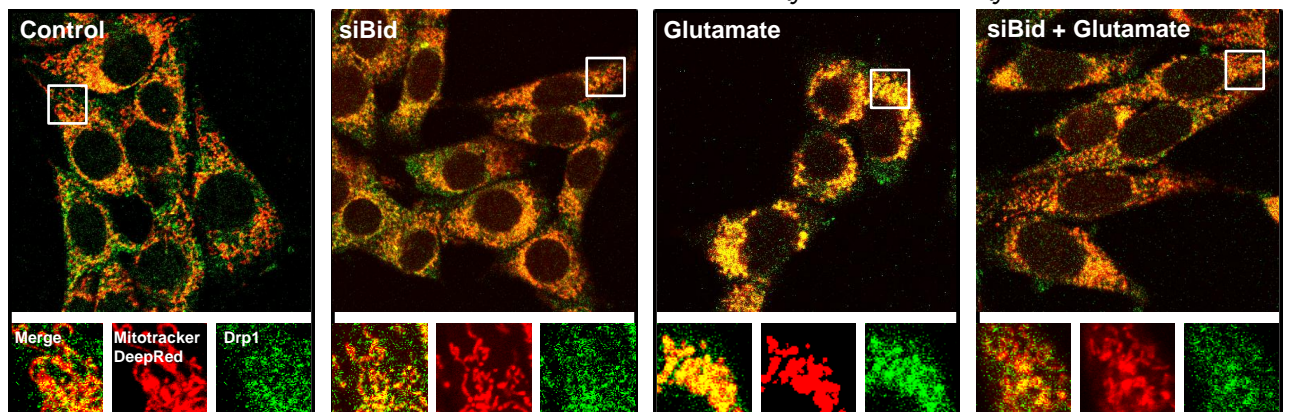



# Supplementary Figure 9

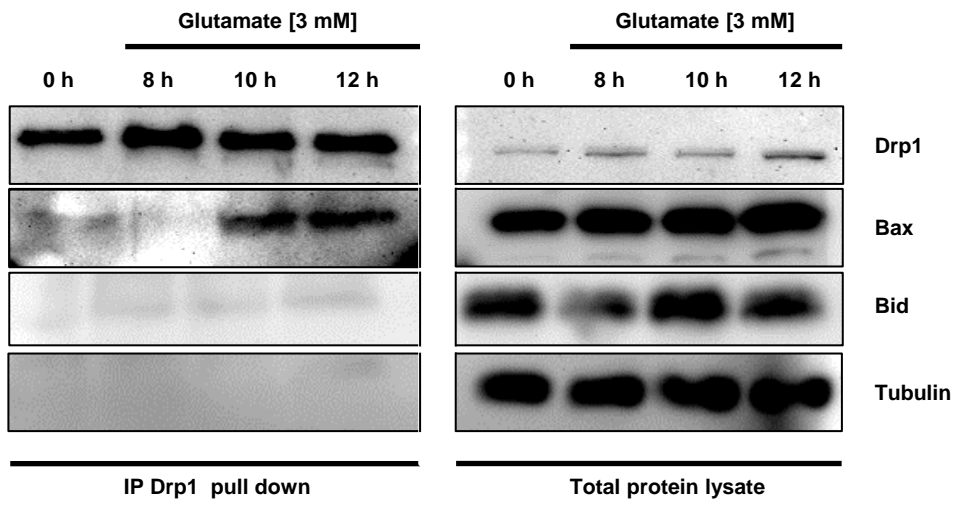

# Supplementary Figure 10

**a**

MBP changes with injection mdivi A during MCAO

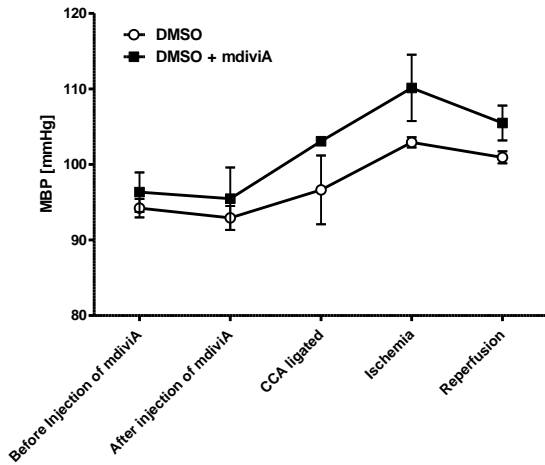

**b**

Blood pH, pCO<sub>2</sub> (mmHg), pO<sub>2</sub> (mmHg), Na<sup>+</sup> (mmol/L), K<sup>+</sup>(mmol/L) measurement at 30 minutes after reperfusion

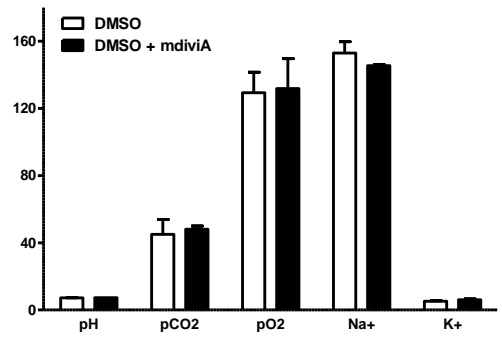

**c**

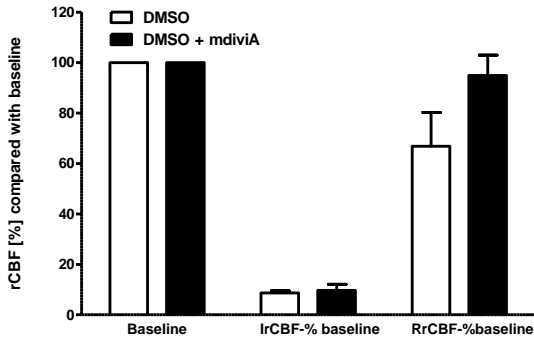

**d**

Temperature changes with injection of mdiviA during MACO

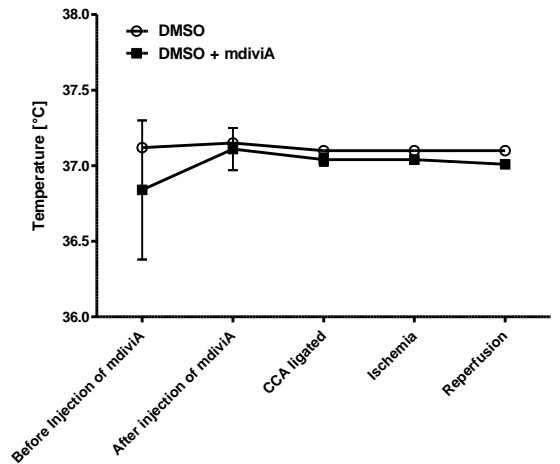

**e**

Body weight changes after injection

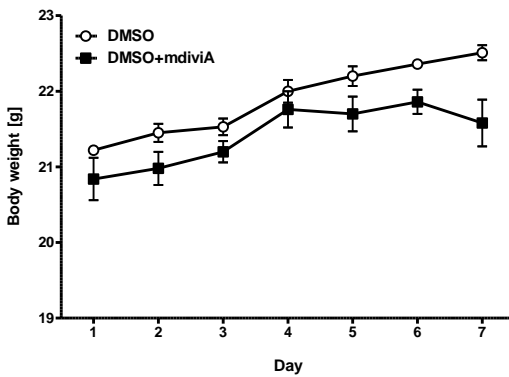

**f**

Temperature changes after injection

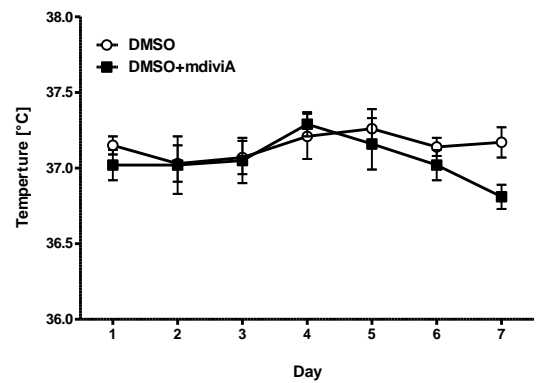

Supplement: cdd201218x1.pdf [file cdd201218x1.pdf]
